# Supplementary material for: Structural Characterization of the Interaction of Hypoxia Inducible Factor-1 with Its Hypoxia Responsive Element at the −964G > A Variation Site of the HLA-G Promoter Region
Source: MDPI journal article supplement (doi:10.3390/ijms222313046), 2021-12-02
Supplement: s1 [file s1]

Supplementary materials

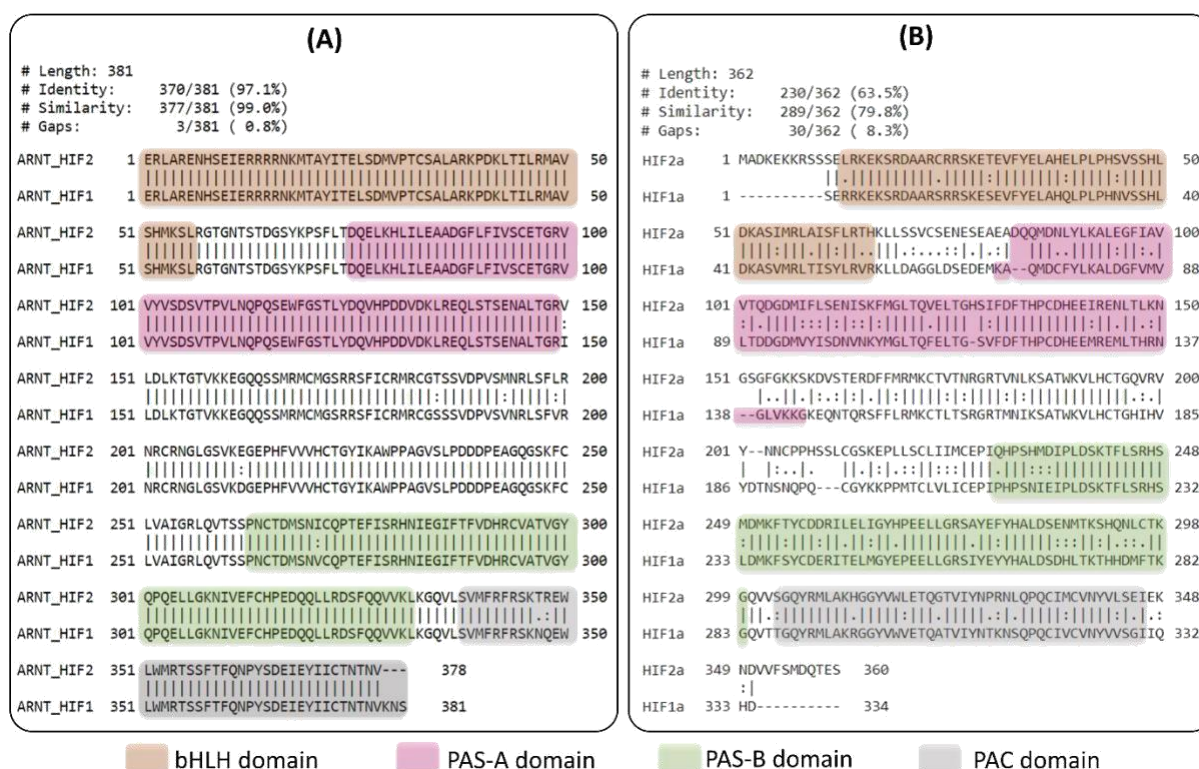

**Figure S1.** Global alignment between the primary sequences of (A)  $\beta$  (ARNT) and (B)  $\alpha$  (HIF1/2a) subunits of HIF1 (human) and HIF2 (mouse) transcription factors performed using the EMBOSS Needle software. bHLH: basic-Helix-Loop-Helix; PAS-A/B: Per-ARNT-Sim A/B; PAC: Per-ARNT-Sim associated C-terminal).

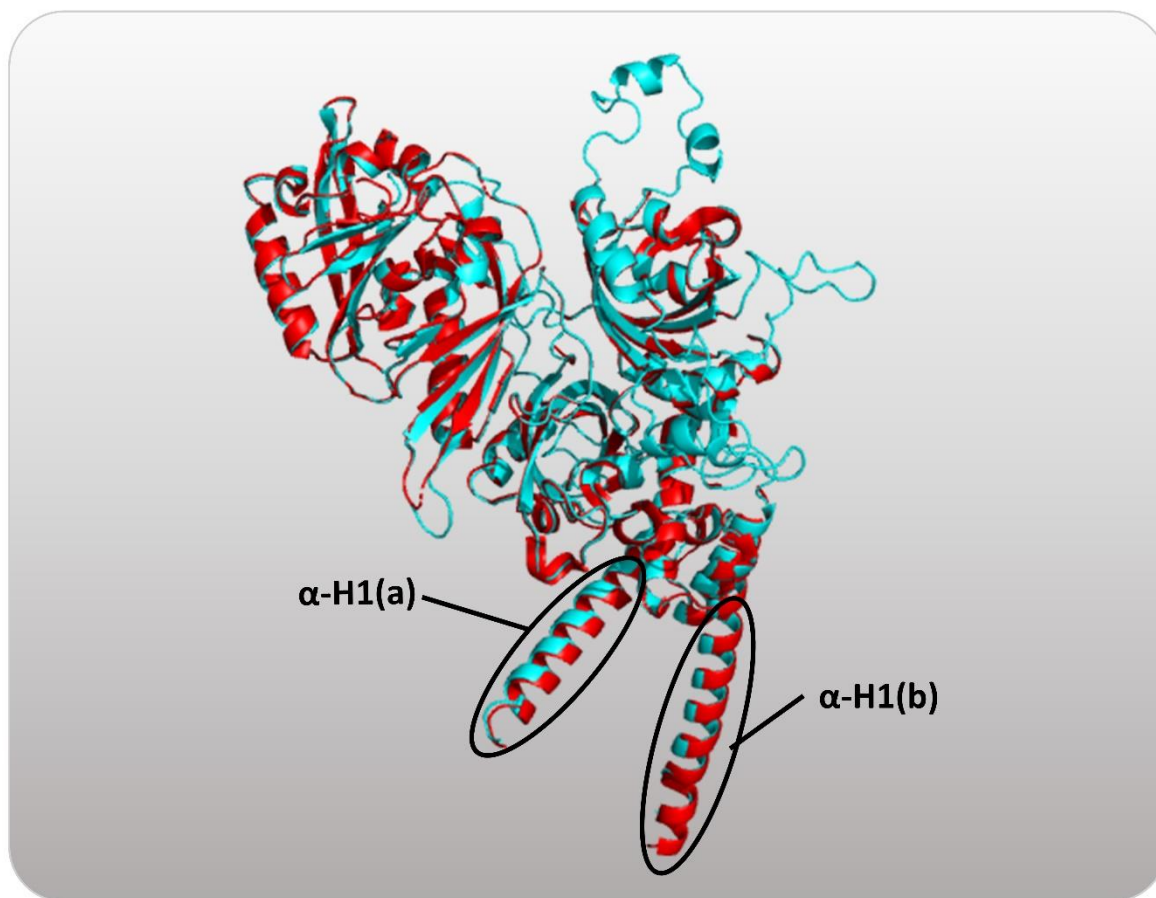

**Figure S2.** 3D structure alignment between homology generated HIF1 model 8 and HIF2 crystal (PDB ID: 4ZPK). The structure in red corresponds to the crystal (template) and in aqua-green corresponds to model 8 with a RMSD value of 0.396 Å.  $\alpha$ -H1 (a) highlight region refers to the  $\alpha$ 1-helix of the HIF1a/HIF2a, and  $\alpha$ -H1 (b) refers to  $\alpha$ 1-Helix of the ARNT. Alignment was performed using align command (cycle = 5) of the PyMol v.2.4 software.

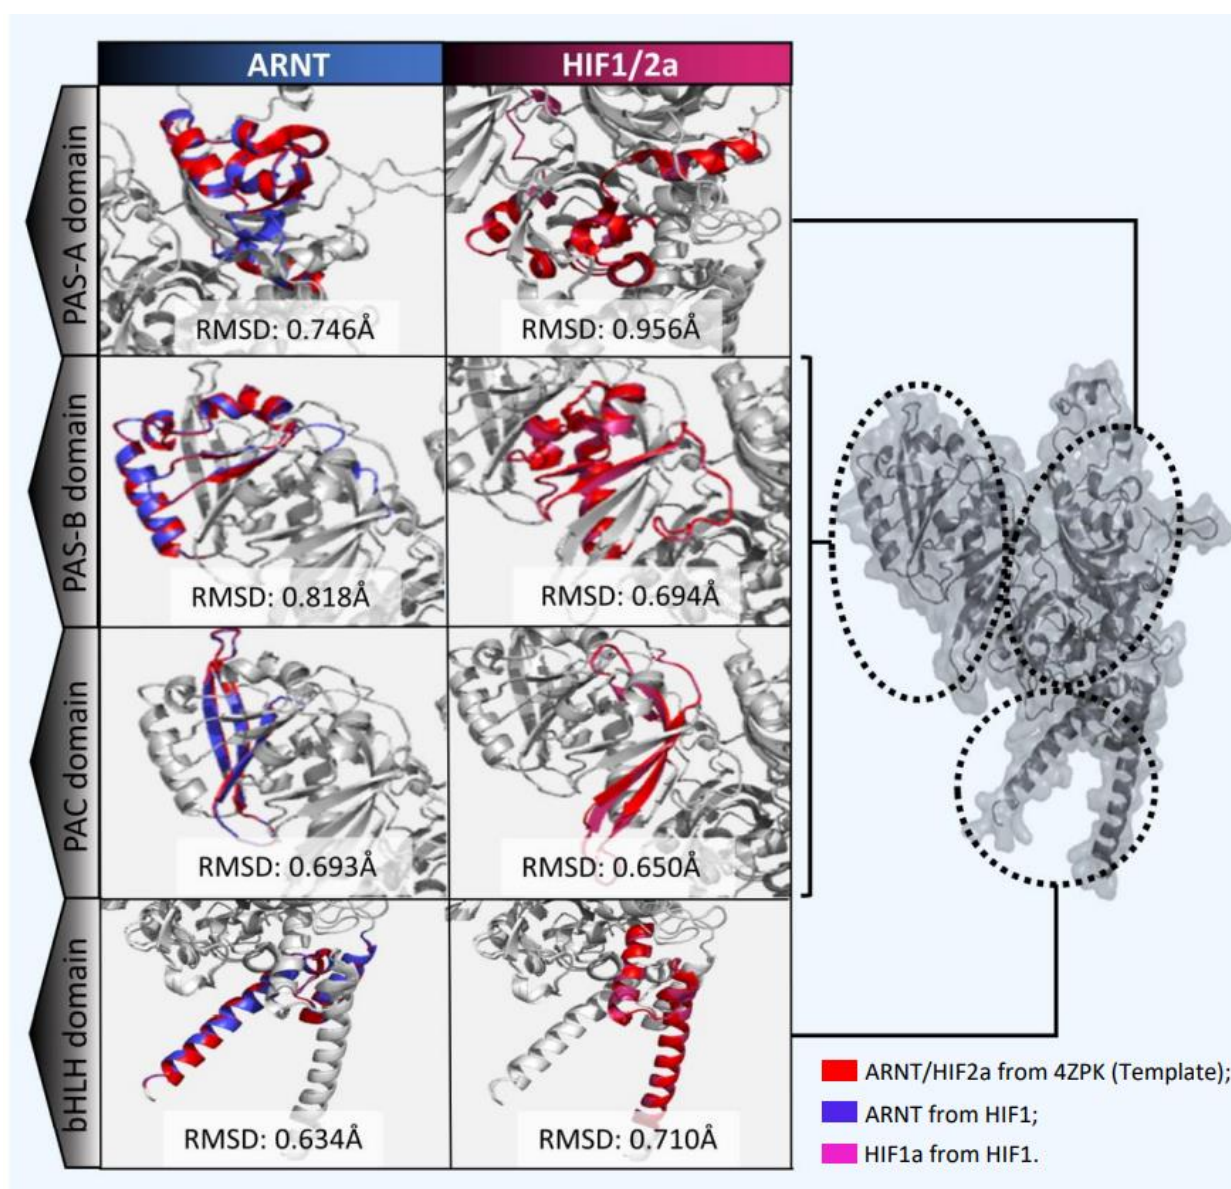

**Figure S3.** Protein domains alignment between HIF1 model 8 and 4ZPK crystal (template). On the left, protein motifs were aligned against each other in the model 8 and the 4ZPK crystal using PyMol align command without outlier rejection (cycles = 0) to the  $\alpha$ -subunits (HIF1/2a) and  $\beta$ -subunits (ARNT). On the right, protein 3D structure representation with motifs regions highlighted with a dotted circle. bHLH: basic-Helix-Loop-Helix; PAS-A/B: Per-ARNT-Sim; PAC: Per-ARNT-Sim associated C-terminal.

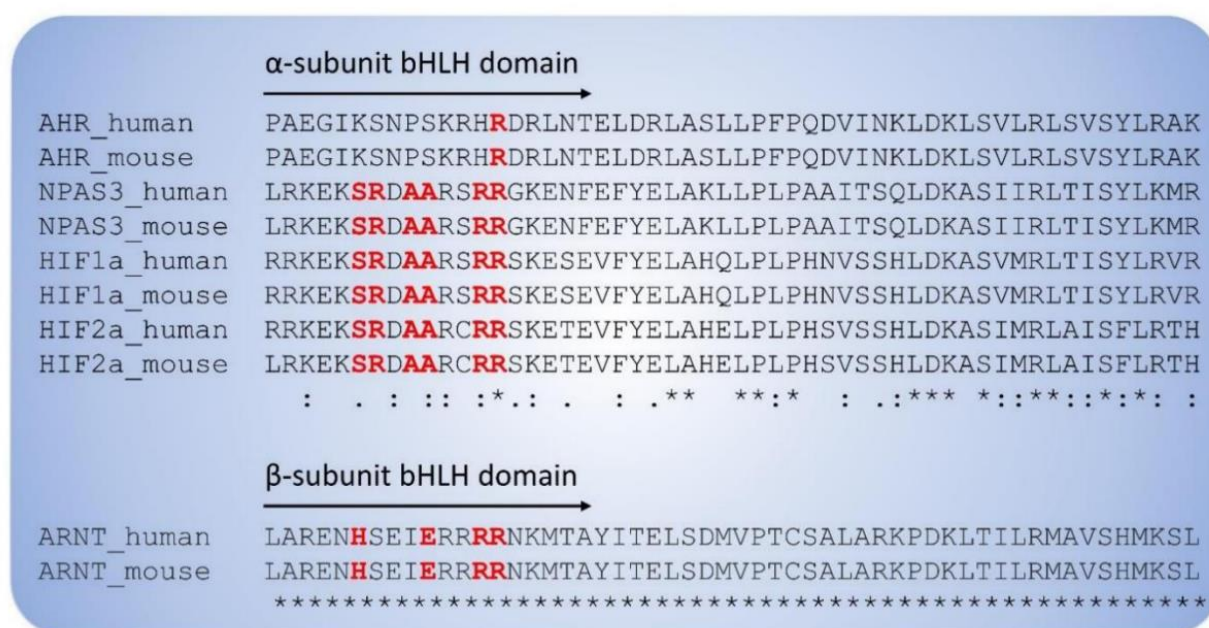

**Figure S4.** Comparison of the bHLH DNA-binding domain among ARNT-binding proteins from mouse and human. Multiple alignment between  $\alpha$ -subunits that interact with the ARNT ( $\beta$ -subunit) to form DNA-binding heterodimers performed by Clustal Omega v.1.2 server. bHLH sequences were retrieved from UniProt database-<https://uniport.org> (UniProt IDs: P35869 to AHR, Q8IXF0 to NPAS3, Q99814 to HIF2a and Q16665 to HIF1a of human  $\alpha$ -subunits; P30561 to AHR, Q9QZQ0 to NPAS3, P97481 to HIF2a and Q61221 to HIF1a of mouse  $\alpha$ -subunits; P27540 to human ARNT and P53762 to mouse ARNT). In the Figure, DNA-binding residues highlighted in red in the  $\alpha$  and  $\beta$  subunits. bHLH: basic-Helix-Loop-Helix; AHR: Aryl hydrocarbon receptor; NPAS3: neuronal PAS domain proteins 3; HIF1/2a: Hypoxia inducible factor 1/2a; ARNT: Aryl hydrocarbon receptor nuclear translocator.
